# Supplementary material
Source: PubMed Central journal article supplement (PMC3059207)
Supplement: NIHMS237675-supplement-1.pdf [file NIHMS237675-supplement-1.pdf]

# Supplementary Figure 1

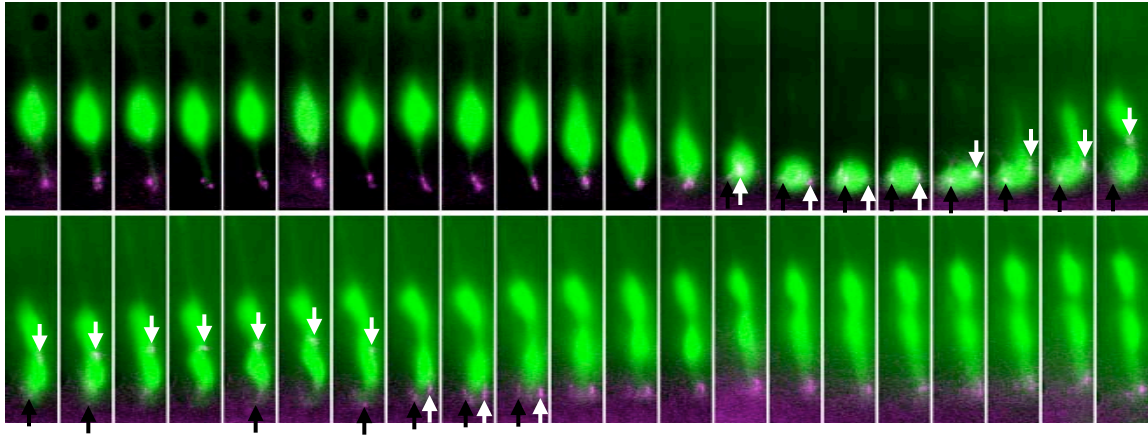

**Supplementary Figure 1. Centrosomal dynamics in radial glial progenitors throughout cell cycle.** In this example, both centrosomes left the ventricular surface and form spindles during mitosis, and, again, subsequently return to this site (Movie S3). Bar = 5  $\mu$ m. Time = hh:mm.

## Supplementary Figure 2

a

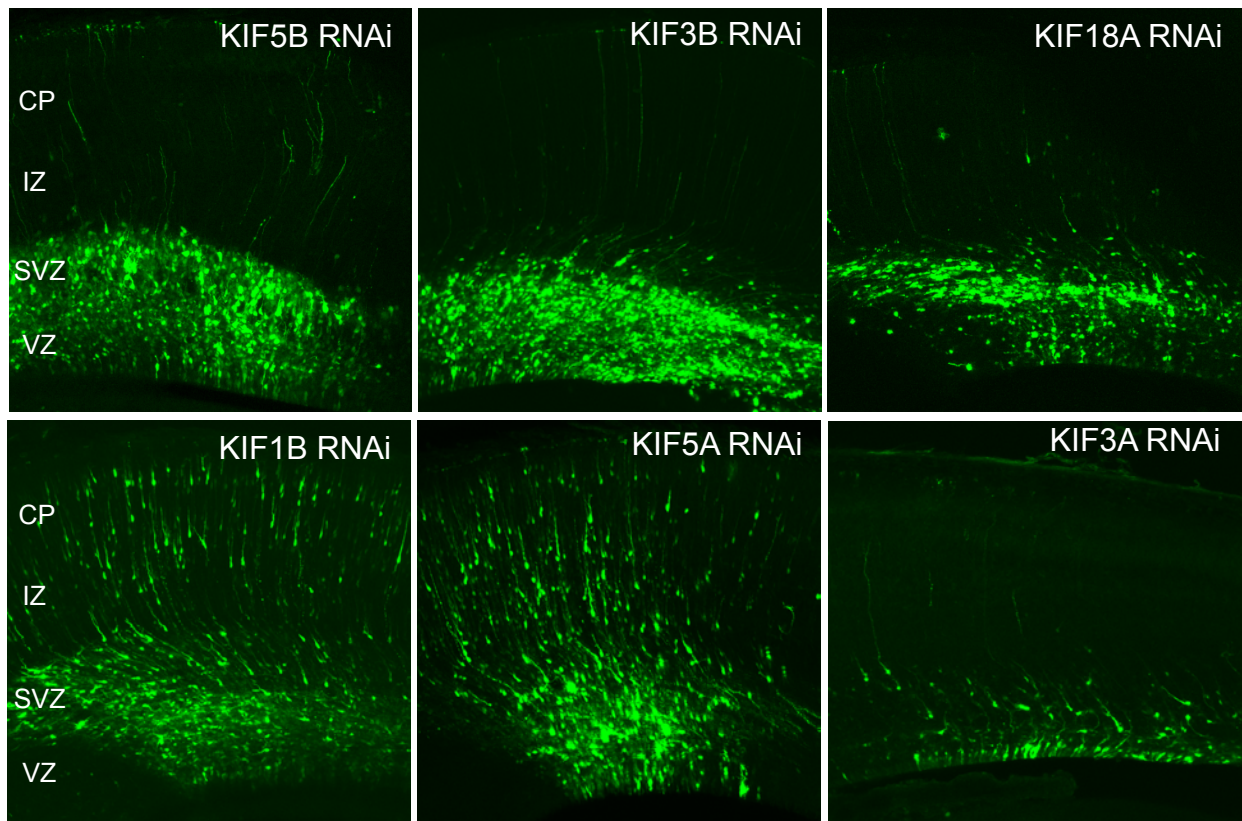

b

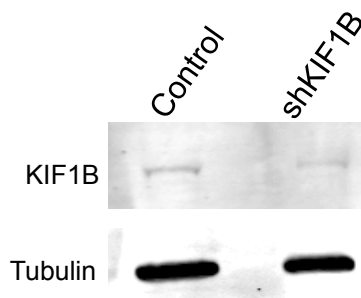

**Supplementary Figure 2. Multiple kinesins involved in brain development.** (a) shRNAs corresponding to sequences within KIF1B, KIF3A, KIF3B, KIF5A, KIF5B, and KIF18A were introduced into E16 rat brain by *in utero* electroporation. GFP fluorescence from the transfected cells was examined in fixed neocortical sections at E20. Strong inhibition of neuronal migration pathway was observed for KIF3A, KIF3B, KIF5B, and KIF18A as indicated by near absence of cells in intermediate zone (IZ) and cortical plate (CP) and accumulation in VZ and SVZ. (Compare with control scrambled E20 rat brain in Fig. 5B.) KIF1B and KIF5A RNAi produced more limited effect on neuronal migration pathway as indicated by loss of concentration of cells at CP. Bar = 50 $\mu$ m. (b) Immunoblot showing ~30% reduction of KIF1B in culture cells 3 days post transfection.

## Supplementary Figure 3

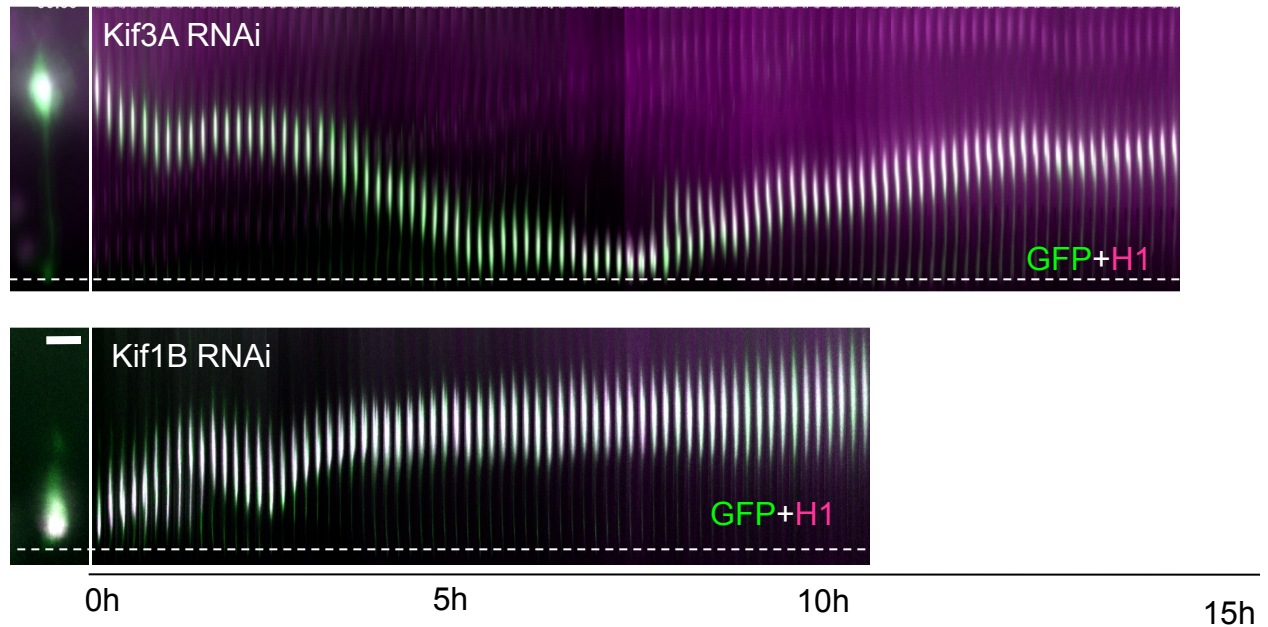

**Supplementary Figure 3. Minimal effects of KIF1B and KIF3A RNAi observed by live brain slice imaging.** E20 rat brain was subjected to *in utero* electroporation with cDNAs encoding KIF3A or KIF1B RNAi at E16. Basally directed nuclear movement in is normal in radial glial cells in each case, though we have noted somewhat faster average apically directed nuclear movement in KIF3A RNAi cells. (White dashed lines indicate ventricular surface; Movie S25, S26) Bar = 5 $\mu$ m.

## Supplementary Figure 4

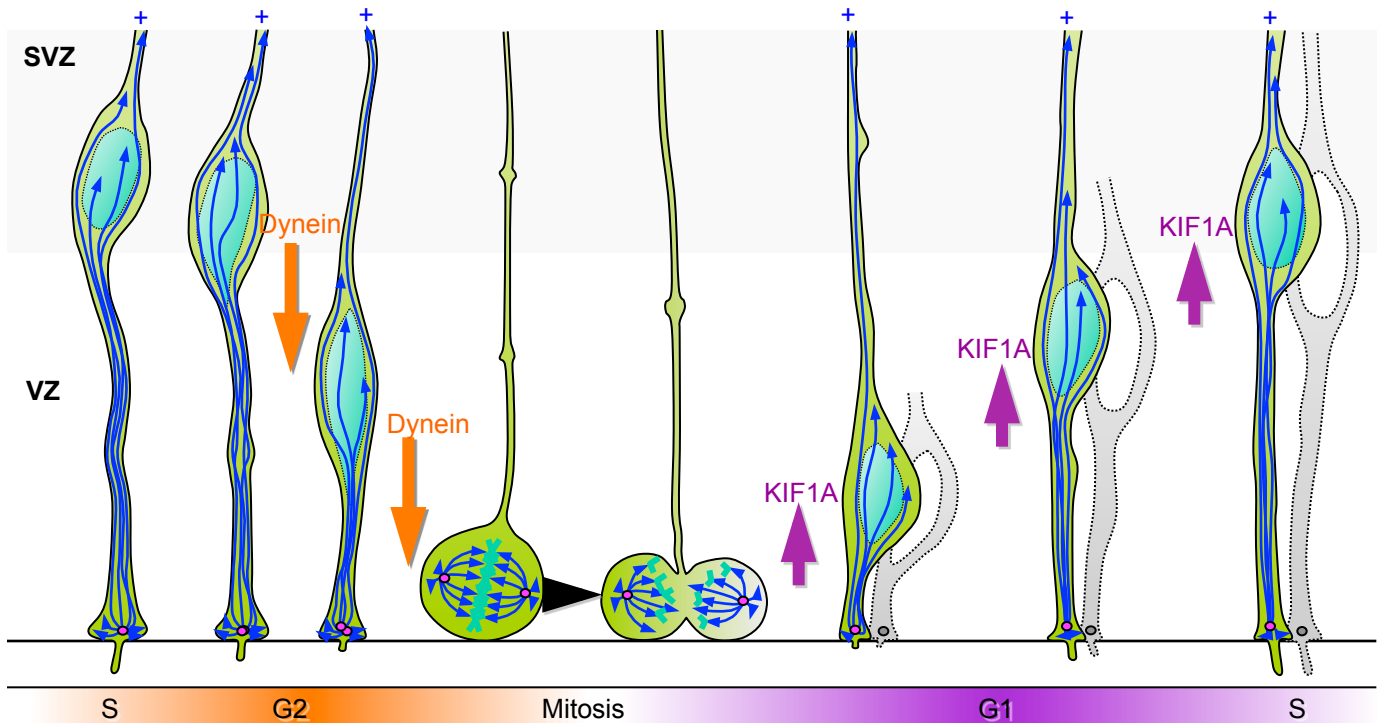

**Supplementary Figure 4. Proposed mechanism for INM.** Centrosomes remain at the ventricular surface throughout the cell cycle. Microtubules (dark blue) radiate from this region and are seen throughout the length of the cell with plus-ends towards the pial surface of the brain. Cytoplasmic dynein transports the nucleus along the microtubules apically toward the ventricular surface, possibly by a similar mechanism and in a similar saltatory manner to that observed in migrating neurons<sup>4</sup>. The basal process of the radial glial cell persists during mitosis, but depleted of microtubules. Microtubules re-enter the basal process by G1 phase, at which stage the plus-end directed microtubule motor KIF1A acts to moves the nucleus slowly and uniformly toward the pial surface of the brain until the cell enters S-phase.

**Supplemental Table 1: Velocity of apical and basally-directed nuclear movement in radial glial cells.**

| Experiment           | Animal used ( <i>n</i> ) | Cell recorded ( <i>n</i> ) | Age <sup>†</sup> | Velocity (μm/min)                      |                                       |
|----------------------|--------------------------|----------------------------|------------------|----------------------------------------|---------------------------------------|
|                      |                          |                            |                  | Apically directed average <sup>#</sup> | Basally directed average <sup>#</sup> |
| DHC RNAi (5-day)     | 4                        | 7                          | E16/E21          | 0.011±0.004 <sup>***</sup>             | ND                                    |
| DHC RNAi (3-day)     | 6                        | 20                         | E16/19           | 0.034±0.021 <sup>***</sup>             | 0.064±0.016                           |
| Myosin 2B RNAi       | 5                        | 16                         | E16/19           | 0.142±0.043                            | 0.071±0.025                           |
| Blebbistatin         | 5                        | 18                         | E16/19           | 0.122±0.036                            | 0.085±0.029                           |
| KIF1A RNAi           | 6                        | 22                         | E16/18           | 0.15±0.055                             | 0.025±0.032 <sup>***</sup>            |
| KIF1A Scramble       | 4                        | 25                         | E16/18           | 0.137±0.041                            | 0.078±0.018                           |
| Control              | 7                        | 23                         | E16/18           | 0.127±0.032                            | 0.069±0.021                           |
| Rescue (DsRed KIF1A) | 4                        | 11                         | E16/18           | 0.132±0.041                            | 0.074±0.026                           |
| Rescue (DsRed)       | 4                        | 12                         | E16/18           | 0.125±0.038                            | 0.034±0.044 <sup>***</sup>            |

Data are compiled from live imaging of radial glial nuclei in Fig. 4, 5, 6, 7.

†: date of electroporation/date of experiment

#: average ±SEM

ND: non-detectable

\*\*\*: p<0.001

## Supplemental Table 2

| Family     | Gene   | Neuronal distribution phenotype | Phenotypic Construct | RNAi sequence          |
|------------|--------|---------------------------------|----------------------|------------------------|
| Kinesin-1  | KIF5A  | +                               | Y                    | GGTGCTGAATGGACTGATGAA  |
|            |        |                                 | Y                    | GCACCGGAGGAAAGGCAGAAA  |
|            |        |                                 | -                    | CGTCACGACTCGAGTCAAGAA  |
|            | KIF5B  | ++                              | Y                    | AGGCTCATTTGTTTCAGAACAA |
|            |        |                                 | Y                    | ATCAGTAGTTTACGAGATGAA  |
|            |        |                                 | Y                    | TGACAAGGATGAAGAGATTAA  |
|            | KIF5C  | +++                             | Y                    | CCAGCCGAATGCAGCATCAAA  |
|            |        |                                 | Y                    | TTGCTTATCTCGCAGCATGAA  |
|            |        |                                 | Y                    | GGCTGTCAATTACGACCAGAA  |
| Kinesin-2  | KIF3A  | +++                             | Y                    | ATAGGAGAATGGCAGCTGAAA  |
|            |        |                                 | -                    | CGCACGCCATCTTCACAATTA  |
|            |        |                                 | Y                    | TTGCTCACATATTTGGTCATA  |
|            | KIF3B  | +++                             | -                    | AGCTAAAGCTCAAGCATCTTA  |
|            |        |                                 | Y                    | ACGTATACCTCATTGCAGCAA  |
|            |        |                                 | Y                    | CAGCTTGGTTGCAGAGGAGAA  |
|            | KIF3C  | ++                              | Y                    | GGTGCCAGCTGGAGTGAATAA  |
|            |        |                                 | Y                    | GAGAGACCTTCCACGTCTAAA  |
|            |        |                                 | -                    | ATGGAGAATTACCTGCAGGAA  |
| Kinesin-3  | KIF1A  | +++                             | Y                    | TCCAGAACTTGACTCCAAGAA  |
|            |        |                                 | Y                    | TTGGCGATATCACTGACATGA  |
|            |        |                                 | -                    | CTGGAGAACTGAGCCTCTTA   |
|            | KIF1B  | +                               | -                    | AGACATGAATGACTGGTTATA  |
|            |        |                                 | -                    | GCGCCAAAGGAACTCGATTAA  |
|            |        |                                 | Y                    | GAAGATCAATGACAACTGTAA  |
|            | KIF1C  | +++                             | Y                    | AGGACCTCTTCTCTCGAGTTA  |
|            |        |                                 | Y                    | CTCATCTCCTCCTCCACATAA  |
|            |        |                                 | Y                    | GAGAAGCATTGCTGGCTGAGA  |
| Kinesin-8  | KIF18A | +++                             | -                    | GGTGCCAGCTGGAGTGAATAA  |
|            |        |                                 | Y                    | GAGAGACCTTCCACGTCTAAA  |
|            |        |                                 | -                    | CTATAATGATAGCTGCTGTTA  |
| Kinesin-11 | KIF26A | +++                             | Y                    | TGAAGGTTATGCTGCGAATAT  |
|            |        |                                 | -                    | CAGTCAGTATCATCAGTAGTA  |
|            |        |                                 | -                    | CATGATGGTCACCTGCTTTGA  |

**Supplemental Table 3: RNAi effect on relative cell distribution in brain developmental layers**

| Experiment         | Animal used ( <i>n</i> ) | Cell counted ( <i>n</i> ) | Age <sup>†</sup> | Cell distribution <sup>#</sup> (%) |          |          |
|--------------------|--------------------------|---------------------------|------------------|------------------------------------|----------|----------|
|                    |                          |                           |                  | VZ/SVZ                             | IZ       | CP       |
| Scramble RNAi      | 6                        | 3815                      | E16/20           | 32.6±4.7                           | 28.8±2.5 | 47.6±4.6 |
| KIF1A RNAi         | 8                        | 4721                      | E16/20           | 88.6±3.8                           | 12.2±1.3 | 0.2±0.06 |
| Rescue DsRed-KIF1A | 6                        | 4011                      | E16/20           | 45.7±2.8                           | 33.8±4.1 | 20.5±2.2 |
| Rescue Myc-Kif1A   | 3                        | 1877                      | E16/20           | 40.6±5.3                           | 38.2±6.9 | 21.2±3.4 |
| Rescue-DsRed       | 5                        | 3165                      | E16/20           | 82.6±5.5                           | 18.1±4.2 | 0.3±0.07 |

†: date of electroporation/date of experiment

#: average ±SEM
